# Supplementary material for: Carotenoid Biosynthesis in Oriental Melon (Cucumis melo L. var. makuwa)
Source: MDPI journal article supplement (doi:10.3390/foods8020077), 2019-02-19
Supplement: s1 [file s1]

```

CmZDS MASGILSFV--SFSGKH--NCHDFRLPARH--SVVLKGCQFLVSSLLRDVSDMSVNAKGLFPPEPERYRGPKLKVAIIAGLAGMSTAVELLDDQGEV 97
CsZDS MASGILSFV--SFSGKH--NCHDFRLPARH--SVVLKGCQFLVSSLLRDVSDMSVNAKGLFPPEPERYRGPKLKVAIIAGLAGMSTAVELLDDQGEV 97
CmoZDS MASGILSFV--SFSGKH--NCHDFRLPARH--SVVLKGCQFLVSSLLRDVSDMSVNAKGLFPPEPERYRGPKLKVAIIAGLAGMSTAVELLDDQGEV 94
VvZDS1 MESSILFEAAGSRAGFXGTVGLFLSGGRRPMPSCLLKGQRLVSRSSLLSDVSDMSVNAKGLFPPEPERYRGPKLKVAIIAGLAGMSTAVELLDDQGEV 100
CuZDS MESSILFEA--SILG-----VSWSR--VQPRCFRFGVRSLLANVSDMSVNAKGLFPPEPERYRGPKLKVAIIAGLAGMSTAVELLDDQGEV 86

CmZDS DYESRRTFIGGKVGSVFVDRGNHIEMGLHVFFGCGYNNLFRMLMKKVGAEKNLLVKDHTHTFVNKGGEIGELDFRFPVGAPIHGIRAFLATNQIGTYDKARN 197
CsZDS DYESRRTFIGGKVGSVFVDRGNHIEMGLHVFFGCGYNNLFRMLMKKVGAEKNLLVKDHTHTFVNKGGEIGELDFRFPVGAPIHGIRAFLATNQIGTYDKARN 197
CmoZDS DYESRRTFIGGKVGSVFVDRGNHIEMGLHVFFGCGYNNLFRMLMKKVGAEKNLLVKDHTHTFVNKGGEIGELDFRFPVGAPIHGIRAFLATNQIGTYDKARN 194
VvZDS1 DYESRRTFIGGKVGSVFVDRGNHIEMGLHVFFGCGYNNLFRMLMKKVGAEKNLLVKDHTHTFVNKGGEIGELDFRFPVGAPIHGIRAFLATNQIGTYDKARN 200
CuZDS DYESRRTFIGGKVGSVFVDRGNHIEMGLHVFFGCGYNNLFRMLMKKVGAEKNLLVKDHTHTFVNKGGEIGELDFRFPVGAPIHGIRAFLATNQIGTYDKARN 186

CmZDS ALALALSPVVKALVDPDAAMKDIRNLDLSISFSEWFLSKGGTRASIQRMDVPVAYALGFIDCDNISARCMLTIFSLFATKTEASLLRMLKGSFVFLSGPI 297
CsZDS ALALALSPVVKALVDPDAAMKDIRNLDLSISFSEWFLSKGGTRASIQRMDVPVAYALGFIDCDNISARCMLTIFSLFATKTEASLLRMLKGSFVFLSGPI 297
CmoZDS ALALALSPVVKALVDPDAAMKDIRNLDLSISFSEWFLSKGGTRASIQRMDVPVAYALGFIDCDNISARCMLTIFSLFATKTEASLLRMLKGSFVFLSGPI 294
VvZDS1 ALALALSPVVKALVDPDAAMKDIRNLDLSISFSEWFLSKGGTRASIQRMDVPVAYALGFIDCDNISARCMLTIFSLFATKTEASLLRMLKGSFVFLSGPI 300
CuZDS ALALALSPVVKALVDPDAAMKDIRNLDLSISFSEWFLSKGGTRASIQRMDVPVAYALGFIDCDNISARCMLTIFSLFATKTEASLLRMLKGSFVFLSGPI 286

CmZDS RKYITDRGGRFHLRWGCREVLYDKFADGETYIPLGLAMSKATNKKIVKADAYVAACDVPGIKRLIPSQWREWEFFDNIYKLIGVPPVTVQLRYNGWVTELO 397
CsZDS RKYITDRGGRFHLRWGCREVLYDKFADGETYIPLGLAMSKATNKKIVKADAYVAACDVPGIKRLIPSQWREWEFFDNIYKLIGVPPVTVQLRYNGWVTELO 397
CmoZDS RKYITDRGGRFHLRWGCREVLYDKFADGETYIPLGLAMSKATNKKIVKADAYVAACDVPGIKRLIPSQWREWEFFDNIYKLIGVPPVTVQLRYNGWVTELO 394
VvZDS1 RKYITDRGGRFHLRWGCREVLYDKFADGETYIPLGLAMSKATNKKIVKADAYVAACDVPGIKRLIPSQWREWEFFDNIYKLIGVPPVTVQLRYNGWVTELO 400
CuZDS RKYITDRGGRFHLRWGCREVLYDKFADGETYIPLGLAMSKATNKKIVKADAYVAACDVPGIKRLIPSQWREWEFFDNIYKLIGVPPVTVQLRYNGWVTELO 386

CmZDS DLERSRQLRQAVGLDNLLYTPDADFSCFADLALTSPEYDYYIEGQGSLLQCVLTPGDPYMPPLNDEIIARVAKQVILFLFPSSQGLEVIWSSVVKIGQSLYR 497
CsZDS DLERSRQLRQAVGLDNLLYTPDADFSCFADLALTSPEYDYYIEGQGSLLQCVLTPGDPYMPPLNDEIIARVAKQVILFLFPSSQGLEVIWSSVVKIGQSLYR 497
CmoZDS DLERSRQLRQAVGLDNLLYTPDADFSCFADLALTSPEYDYYIEGQGSLLQCVLTPGDPYMPPLNDEIIARVAKQVILFLFPSSQGLEVIWSSVVKIGQSLYR 494
VvZDS1 DLERSRQLRQAVGLDNLLYTPDADFSCFADLALTSPEYDYYIEGQGSLLQCVLTPGDPYMPPLNDEIIARVAKQVILFLFPSSQGLEVIWSSVVKIGQSLYR 500
CuZDS DLERSRQLRQAVGLDNLLYTPDADFSCFADLALTSPEYDYYIEGQGSLLQCVLTPGDPYMPPLNDEIIARVAKQVILFLFPSSQGLEVIWSSVVKIGQSLYR 486

CmZDS EAPGKDPPRPDQRTPIKNFFLAGSYTKQDYIDSMEGATLSGRQASAYICDAGEELMMLREKICDESS---ETAKSS--DELSLV 576
CsZDS EAPGKDPPRPDQRTPIKNFFLAGSYTKQDYIDSMEGATLSGRQASAYICDAGEELMMLREKICDESS---ETAKSS--DELSLV 576
CmoZDS EAPGKDPPRPDQRTPIKNFFLAGSYTKQDYIDSMEGATLSGRQASAYICDAGEELMMLREKICDESS---ETAKSS--DELSLV 573
VvZDS1 EAPGKDPPRPDQRTPIKNFFLAGSYTKQDYIDSMEGATLSGRQASAYICDAGEELMMLREKICDESS---ETAKSS--DELSLV 583
CuZDS EAPGKDPPRPDQRTPIKNFFLAGSYTKQDYIDSMEGATLSGRQASAYICDAGEELMMLREKICDESS---ETAKSS--DELSLV 570

```

**Figure S1.** Multiple alignments of the amino acid sequences of CmZDS with other ZDSs. Identical residues are indicated by a black background, and similar residues are shaded with a gray background. The solid underline indicates the dinucleotide-binding domain, and the dotted underline indicates the carotenoid-binding domain. CsZDS, *Cucumis sativus* (XM\_004142474); CmoZDS, *Cucurbita moschata* (JN253179); VvZDS1, *Vitis vinifera* (JQ319636); CuZDS1, *Citrus unshiu* (AB072343).

```

CmLCYE  MEQCGLAARNFAAMASNTSNTASTGTRRLQILCRTESRFRLRRPSVLAM-----ASAGSESCIAVEEGFADIEDYIKGGSELLFVQMCKNTMEMQS 95
CsLCYE  MEQCGLTARNFAAMASNTSNTASTGTRRLQILCRTESLQFRLRRPSVFM-----ASAGSESCIAVEEGFADIEDYIKGGSELLFVQMCKNTMEMQS 95
CsaLCYE MEQCG--ARNFAAMAVS--TCPIWRYRKRRQNTLTRVIHHSSYTSSTLRVRS-----SAGSESCVAFEEGFADEEDYIKAGGSELLFVQMCKNTMEMQS 93
GmLCYE  MECVA--ARNLAAMAFV--VSPISRLRIRRRKIRRRRTASSSSCGGRGVRLKVEAFAGSESCVATTEDEFADEEDYIKAGGSELLFVQMCKNTMEMQS 97
VvLCYE  MECIC--AFNFAAMAVS--TSAPWRERRRRRMPENACFNHSDCYLPSVRVR-----ASAGSESCVVEEGFADEEDYIKAGGSELLFVQMCKNTMEMQS 92

CmLCYE  KLADLPPISIGNGLDLVVIGCGPAGLALAAESAPLGLKVGLIGPDLPTNNYGVWEDEFKDLGLEGCIEHVMDTIVYLDKDK--PVLIG--RAYGRVSR 193
CsLCYE  KLADLPPISVGNGLDLVVIGCGPAGLALAAESAPLGLKVGLIGPDLPTNNYGVWEDEFKDLGLEGCIEHVMDTIVYLDKDK--PVLIG--RAYGRVSR 193
CsaLCYE KLADKLPPISVGNGLDLVVIGCGPAGLALAAESAKLGLSVGLIGPDLPTNNYGVWEDEFKDLGLEGCIEHVMDTIVYLDKDK--PVLIG--RAYGRVSR 193
GmLCYE  KLADKLPPISVGNGLDLVVIGCGPAGLALAAESAKLGLSVGLIGPDLPTNNYGVWEDEFKDLGLEGCIEHVMDTIVYLDKDK--PVLIG--RAYGRVSR 193
VvLCYE  KLADKLPPISVGNGLDLVVIGCGPAGLALAAESAKLGLSVGLIGPDLPTNNYGVWEDEFKDLGLEGCIEHVMDTIVYLDKDK--PVLIG--RAYGRVSR 190

CmLCYE  HLLHEELLKRCIKSGVSYLNSRVNSIVETTSNGHSLVCEEDIVPCRLATVASGAASGKLLQYEVGGPK--VSVQTAYGVEVEENNPYDPSLMVFM DYRD 292
CsLCYE  HLLHEELLKRCIKSGVSYLNSRVNSIVETTSNGHSLVCEEDIVPCRLATVASGAASGKLLQYEVGGPK--VSVQTAYGVEVEENNPYDPSLMVFM DYRD 292
CsaLCYE HLLHEELLKRCVSGVSYLNSRVNSIVETTSNGHSLVCEEDIVPCRLATVASGAASGKLLQYEVGGPK--VSVQTAYGVEVEENNPYDPSLMVFM DYRD 292
GmLCYE  HLLHEELLKRCVSGVSYLNSRVNSIVETTSNGHSLVCEEDIVPCRLATVASGAASGKLLQYEVGGPK--VSVQTAYGVEVEENNPYDPSLMVFM DYRD 292
VvLCYE  HLLHEELLKRCVSGVSYLNSRVNSIVETTSNGHSLVCEEDIVPCRLATVASGAASGKLLQYEVGGPK--VSVQTAYGVEVEENNPYDPSLMVFM DYRD 290

CmLCYE  YARHENSLEAQYPTFLYAMPMSPTKVFFETCLASKEAMPFDLLKKKLSRLRTMGIRIRVKTYYYEWSYIPVGGSLPNTQKNLAFGAAASMVHPATGY 392
CsLCYE  YARHENSLEAQYPTFLYAMPMSPTKVFFETCLASKEAMPFDLLKKKLSRLRTMGIRIRVKTYYYEWSYIPVGGSLPNTQKNLAFGAAASMVHPATGY 392
CsaLCYE YARHENSLEAQYPTFLYAMPMSPTKVFFETCLASKEAMPFDLLKKKLSRLRTMGIRIRVKTYYYEWSYIPVGGSLPNTQKNLAFGAAASMVHPATGY 392
GmLCYE  YARHENSLEAQYPTFLYAMPMSPTKVFFETCLASKEAMPFDLLKKKLSRLRTMGIRIRVKTYYYEWSYIPVGGSLPNTQKNLAFGAAASMVHPATGY 392
VvLCYE  YARHENSLEAQYPTFLYAMPMSPTKVFFETCLASKEAMPFDLLKKKLSRLRTMGIRIRVKTYYYEWSYIPVGGSLPNTQKNLAFGAAASMVHPATGY 390

CmLCYE  SVVRSLSAPKYASVIAKILKQGHSEKLSRSTENISMCAWNTLWPQERKRQRAFFLFGALILQLDIEGIRTFRTFFCLPDWMWQGLGSTLSSAD 492
CsLCYE  SVVRSLSAPKYASVIAKILKQGHSEKLSRSTENISMCAWNTLWPQERKRQRAFFLFGALILQLDIEGIRTFRTFFCLPDWMWQGLGSTLSSAD 492
CsaLCYE SVVRSLSAPKYASVIAKILKQGHSEKLSRSTENISMCAWNTLWPQERKRQRAFFLFGALILQLDIEGIRTFRTFFCLPDWMWQGLGSTLSSAD 492
GmLCYE  SVVRSLSAPKYASVIAKILKQGHSEKLSRSTENISMCAWNTLWPQERKRQRAFFLFGALILQLDIEGIRTFRTFFCLPDWMWQGLGSTLSSAD 492
VvLCYE  SVVRSLSAPKYASVIAKILKQGHSEKLSRSTENISMCAWNTLWPQERKRQRAFFLFGALILQLDIEGIRTFRTFFCLPDWMWQGLGSTLSSAD 490

CmLCYE  LALFAFYMFVIAPNLRMCLVKHLLSDPTGATMIRTYLTIA 533
CsLCYE  LALFAFYMFVIAPNLRMCLVKHLLSDPTGATMIRTYLTIA 533
CsaLCYE LALFAFYMFVIAPNLRMCLVKHLLSDPTGATMIRTYLTIA 532
GmLCYE  LALFAFYMFVIAPNLRMCLVKHLLSDPTGATMIRTYLTIA 532
VvLCYE  LALFAFYMFVIAPNLRMCLVKHLLSDPTGATMIRTYLTIA 530

```

**Figure S2.** Multiple alignments of the amino acid sequences of CmLCYE with other LCYEs. Identical residues are indicated by a black background, and similar residues are shaded with a gray background. The solid underline indicates a dinucleotide binding motif, and the dotted underlines indicate two cyclase motifs. CsLCYE, *Cucumis sativus* (XM\_004141124); CsaLCYE, *Camellia sinensis* var. *assamica* (HM536196); GmLCYE, *Glycine max* (XM\_003533727); VvLCYE, *Vitis vinifera* (NM\_001281164).

|         |                                                                                                     |     |
|---------|-----------------------------------------------------------------------------------------------------|-----|
| CmCHXB  | MAAPLSAALLPKP----FHIFLSSSLSPKPPFELFPSPVFNSRFQWKMRRKTLLTVCVLVEDQ--SSGFWHSLDDESEFIIVPQIPSPHVSERLARK   | 95  |
| CsCHXB  | MAAGLSAATLPK----FHIFLSSSLSPKPPFELFPSPVFNSRFQWKMRRKTLLTVCVLVEDQ--SSGFWHSLDDESEFIIVPQIPSPHVSERLARK    | 95  |
| CmoCHXB | MAASLSAVLGPKP----FHIFLSSSLSPKPPFELFPSPVFNSRFQWKMRRKTLLTVCVLVEDQ--SSSEVENLADKLLIIVPQIPSPHVAEKLARK    | 95  |
| VvCHXB2 | MAVENSVATSSRSPLGRNEFLGPKPTSEFTPT-SLEIPSTRHEN-IFRCRKTRLTVCVVEEKLSTEWENRSEB---TLASQISARVAEKLARK       | 95  |
| InCHXB  | MAVGLSIAASSRTVYSCQFSLVRPATHSAPPS-ILFSLSPFRSSVLSRRKPSLTVCVFIIEDEKLESGGVEIRAEIERALEKQISASRTAEKLARK    | 99  |
|         | HXXXH HXXHH                                                                                         |     |
| CmCHXB  | KSERFTYLVAAMSSFGITSMAMVAVYYRFWQMEGGEIPFSEMFGTFSLVGAAVGMFWARWAHRLWHSLSLWHMHESHHPREGPFELNDVFAITNA     | 195 |
| CsCHXB  | KSERFTYLVAAMVMSFGITSMAMVAVYYRFWQMEGGEIPFSEMFGTFSLVGAAVGMFWARWAHRLWHSLSLWHMHESHHPREGPFELNDVFAITNA    | 195 |
| CmoCHXB | KSERFTYLVAAMSSFGITSMAMVAVYYRFWQMEGGEIPFSEMFGTFALVGAAVGMFWARWAHRLWHSLSLWHMHESHHPREGPFELNDVFAITNA     | 195 |
| VvCHXB2 | KSERFTYLVAAMSSFGITSMAMVAVYYRFWQMEGGEIPFSEMFGTFALVGAAVGMFWARWAHRLWHSLSLWHMHESHHPREGPFELNDVFAITNA     | 195 |
| InCHXB  | KSERFTYLVAAMSSLGITSMAMVAVYYRFWQMEGGEIPFSEMFGTFALVGAAVGMFWARWAHRLWHSLSLWHMHESHHPREGPFELNDVFAITNA     | 199 |
|         | HXXXH HXXHH                                                                                         |     |
| CmCHXB  | VPAIALLSYGFFHKGLVPGLCFAGLGITVFGMAYMFVHDGLVHKRFPVGPPIANVPYFRKVAHAHQHSDKFNGVPYGLFLGPKELEEVGGLLEELEKEI | 295 |
| CsCHXB  | VPAIALLSYGFFHKGLVPGLCFAGLGITVFGMAYMFVHDGLVHKRFPVGPPIANVPYFRKVAHAHQHSDKFNGVPYGLFLGPKELEEVGGLLEELEKEI | 295 |
| CmoCHXB | VPAIALLSYGFFHKGLVPGLCFAGLGITVFGMAYMFVHDGLVHKRFPVGPPIANVPYFRKVAHAHQHSDKFNGVPYGLFLGPKELEEVGGLLEELEKEI | 295 |
| VvCHXB2 | VPAIALLSYGFFHKGLVPGLCFAGLGITVFGMAYMFVHDGLVHKRFPVGPPIANVPYFRKVAHAHQHSDKFNGVPYGLFLGPKELEEVGGLLEELEKEI | 295 |
| InCHXB  | VPAIALLSYGFFHKGLVPGLCFAGLGITVFGMAYMFVHDGLVHKRFPVGPPIANVPYFRKVAHAHQHSDKFNGVPYGLFLGPKELEEVGGINLEVEI   | 299 |
| CmCHXB  | NRRIKWTARKSNYGS                                                                                     | 310 |
| CsCHXB  | NRRIKWTARKSIIGS                                                                                     | 310 |
| CmoCHXB | NRRIKWTARKPINGS                                                                                     | 310 |
| VvCHXB2 | NRRAISNGPR----                                                                                      | 306 |
| InCHXB  | NRRIKMSSTGR----                                                                                     | 310 |

**Figure S3.** Multiple alignments of the amino acid sequences of CmCHXB with other CHXBs. Identical residues are indicated by a black background, and similar residues are shaded with a gray background. HXXXH and HXXHH, where X encodes for any amino acid, represent 4 conservatively spaced histidine motifs. CsCHXB, *Cucumis sativus* (XM\_004140710); CmoCHXB, *Cucurbita moschata* (JN253180); VvCHXB2, *Vitis vinifera* (XM\_002273545); InCHXB, *Ipomoea nil* (AB499058).



```

CmCHXE ----- 1
CsCHXE ----- 60
VvCHXE -MPSLMSLSFALLTETFTFNFKPTTLFNPSPFY---LSITCSSDNNPKPTRSSSWVSPDWLTSLSRSLTMCQ-DDSGIPNATAKLDVSELLGGALFLP 95
FvCHXE MLCSLHSFSSLTLLPSESS---PKPTTFHFSFSI---RSTNKDPENNSKPTSTSWVSPDWLTSLSRSLTTSKNDSDGIPNATAKLDVSELLGGALFLP 94
DcCHXE --MPYHSISLSLPLPEIRQNLSKHHPEFHQPPHSLPLSIKSSLDIKPPKSNQGSWVSPDWLTSLSRSLTTSK--DDSNIPNATAKLDVSELLGGALFLP 97

CmCHXE ----- 1
CsCHXE LFKWMNMYGPIYRLAAGPRNFVVSDPAIAKHVLRNYGYAKGLVSEVSEFLFGSGFAIAEGPLWTRRRRAVVPSLHKKYL SVIVDRVFCKCAMLVEKL 160
VvCHXE LFKWMNMYGPIYRLAAGPRNFVVSDPAIAKHVLRNYGYAKGLVAEVSEFLFGSGFAIAEGPLWTRRRRAVVPSLHKKYL SVIVDRVFCKCAMLVEKL 195
FvCHXE LFKWMNMYGPIYRLAAGPRNFVVSDPAIAKHVLRNYGYAKGLVAEVSEFLFGSGFAIAEGPLWTRRRRAVVPSLHKKYL SVIVDRVFCKCAMLVEKL 194
DcCHXE LFKWMNMYGPIYRLAAGPRNFVVSDPAIAKHVLRNYGYAKGLVAEVSEFLFGSGFAIAEGPLWTRRRRAVVPSLHKKYL SVIVDRVFCKCAMLVEKL 197

CmCHXE ----- 1
CsCHXE RKDALNNSVNMEEFSQLTLDVIGLSVFNYFDSLSLTDSPVIDAVYTALKEAEARSTDILPYWKIALCKIIPRQIKAEAVTVIRKTVVEELIAKCKEI 260
VvCHXE RTDALNGSAVNMEEFSQLTLDVIGLSVFNYNFDLSLTADSPVIDAVYTALKEAEARSTDILPYWKIALCKIIPRQIKAEAVTVIRKTVVEELIAKCKEI 295
FvCHXE QADALNGSAVNMEEFSQLTLDVIGLSVFNYNFDLSLTADSPVIDAVYTALKEAEARSTDILPYWKIALCKIIPRQIKAEAVTVIRKTVVEELIAKCKEI 294
DcCHXE RISALNGSAVNMEEFSQLTLDVIGLSVFNYNFDLSLTADSPVIDAVYTALKEAEARSTDILPYWKIALCKIIPRQIKAEAVTVIRKTVVEELIAKCKEI 297

CmCHXE ----- 1
CsCHXE VEREGERISEEYVNEADPSILRFLASREEVSSQLRDDLLSMLVAGHETTGSGVLTWTLYLLSKHSSSLKACAEVDRVLQGRFPSYEDIKELKELTRC 360
VvCHXE VEREGERISEEYVNEADPSILRFLASREEVSSQLRDDLLSMLVAGHETTGSGVLTWTLYLLSKHSSSLKACAEVDRVLQGRFPSYEDIKELKELTRC 395
FvCHXE VEREGERISEEYVNEADPSILRFLASREEVSSQLRDDLLSMLVAGHETTGSGVLTWTLYLLSKHSSSLKACAEVDRVLQGRFPSYEDIKELKELTRC 394
DcCHXE VEREGERISEEYVNEADPSILRFLASREEVSSQLRDDLLSMLVAGHETTGSGVLTWTLYLLSKHSSSLKACAEVDRVLQGRFPSYEDIKELKELTRC 397

CmCHXE ---MRLYPHPVLIIRRAQVADLPGNKYKNAGQDIMISVYNIHRSQVWECAEEFIPERFDLEGPVPNESNTDFRFIPFSGGPRKCVGDQFALLEAIVA 96
CsCHXE ILESMLRYPHPVLIIRRAQVADLPGNKYKNAGQDIMISVYNIHRSQVWECAEEFIPERFDLEGPVPNESNTDFRFIPFSGGPRKCVGDQFALLEAIVA 460
VvCHXE INESMLRYPHPVLIIRRAQVADLPGNKYKNAGQDIMISVYNIHRSQVWECAEEFIPERFDLEGPVPNESNTDFRFIPFSGGPRKCVGDQFALLEAIVA 495
FvCHXE IMESTRLYPHPVLIIRRAQVADLPGNKYKNAGQDIMISVYNIHRSQVWECAEEFIPERFDLEGPVPNESNTDFRFIPFSGGPRKCVGDQFALLEAIVA 494
DcCHXE INESMLRYPHPVLIIRRAQVADLPGNKYKNAGQDIMISVYNIHRSQVWECAEEFIPERFDLEGPVPNESNTDFRFIPFSGGPRKCVGDQFALLEAIVA 497

CmCHXE LAIFLQHLNFELVPDNIEMTTGATIHTTNGLYMKLSQRKLTPELVSSATSR 148
CsCHXE LAIFLQHLNFELVPDNIEMTTGATIHTTNGLYMKLSQRKLTPELVSSATSR 512
VvCHXE LAIFLQHLNFELVPDNIEMTTGATIHTTNGLYMKLSQRKLTPELVSSATSR-- 546
FvCHXE LAIFLQHLNFELVPDNIEMTTGATIHTTNGLYMKLSQRKLTPELVSSATSR-- 544
DcCHXE LAIFLQHLNFELVPDNIEMTTGATIHTTNGLYMKLSQRKLTPELVSSATSR-- 548

```

**Figure S4.** Multiple alignments of the amino acid sequences of CmCHXE with other CHXEs. Identical residues are indicated by a black background, and similar residues are shaded with a gray background. CsCHXE, *Cucumis sativus* (XM\_004156280); VvCHXE, *Vitis vinifera* (XM\_002264979); FvCHXE, *Fragaria vesca* (XM\_004306122); DcCHXE, *Daucus carota* (DQ192196).

CmZEP MALTRFHNPNLSSSLSRTCFPVPAPFREYLVEISPCQRIGCNFEGGKSACGRKKVTVQKAAVAEAPPAEGAAGEISRSPLTKNVRILVAGGGIGGLVFA 100  
 CsZEP MALTRFHNPNLSSSLSRTCFPVPAPFREYLVEISPCQRIGCNFEGGKSACGRKKVTVQKAAVAEAPPAEGAAGEISRSPLTKNVRILVAGGGIGGLVFA 100  
 ClZEP MALTRFHNPNLSSSLSRTCFPVPAPFREYLVEISPCQRIGCNFEGGKSACGRKKVTVQKAAVAEAPPAEGAAGEISRSPLTKNVRILVAGGGIGGLVFA 100  
 CmoZEP NVNTRFHNPNLSSSLSRTCFPVPAPFREYLVEISPCQRIGCNFEGGKSACGRKKVTVQKAAVAEAPPAEGAAGEISRSPLTKNVRILVAGGGIGGLVFA 100  
 PaZEP MASLTFNNSNLAAVFSSTFFETINKDEFLEISPSQTHTDYHLRSATRSGQKFCITFVRAIVASPTFVPSAP----ASTQPKILRILVAGGGIGGLVFA 96

CmZEP LAARKRGFDVVVFEDISAIRGEGQYRGPIQIQSNALAALAEIDLVAEEVMRVGCITGDRINGLVDGVSGNWIYKFDFTTPAERGLPVTRVISRMALQ 200  
 CsZEP LAARKRGFDVVVFEDISAIRGEGQYRGPIQIQSNALAALAEIDLVAEEVMRVGCITGDRINGLVDGVSGNWIYKFDFTTPAERGLPVTRVISRMALQ 200  
 ClZEP LAARKRGFDVVVFEDISAIRGEGQYRGPIQIQSNALAALAEIDLVAEEVMRVGCITGDRINGLVDGVSGNWIYKFDFTTPAERGLPVTRVISRMALQ 200  
 CmoZEP LAARKRGFDVVVFEDISAIRGEGQYRGPIQIQSNALAALAEIDLVAEEVMRVGCITGDRINGLVDGVSGNWIYKFDFTTPAERGLPVTRVISRMALQ 200  
 PaZEP LAARKRGFDVVVFEDISAIRGEGQYRGPIQIQSNALAALAEIDLVAEEVMRVGCITGDRINGLVDGVSGNWIYKFDFTTPAERGLPVTRVISRMALQ 196

CmZEP QILARAVGDDVVIINDSNVDFEDNGEKVKVTLENGQCQHEGDLVAGDIWSKVRKNLFGHSEAVYSGYTCYTGIADFIPADIE TVGYRVFLGHKQYFVSS 300  
 CsZEP QILARAVGDDVVIINDSNVDFEDNGEKVKVTLENGQCQHEGDLVAGDIWSKVRKNLFGHSEAVYSGYTCYTGIADFIPADIE TVGYRVFLGHKQYFVSS 300  
 ClZEP QILARAVGDDVVIINDSNVDFEDNGEKVKVTLENGQCQHEGDLVAGDIWSKVRKNLFGHSEAVYSGYTCYTGIADFIPADIE TVGYRVFLGHKQYFVSS 300  
 CmoZEP QILARAVGDDVVIINDSNVDFEDNGEKVKVTLENGQCQHEGDLVAGDIWSKVRKNLFGHSEAVYSGYTCYTGIADFIPADIE TVGYRVFLGHKQYFVSS 300  
 PaZEP QILARAVGDDVVIINDSNVDFEDNGEKVKVTLENGQCQHEGDLVAGDIWSKVRKNLFGHSEAVYSGYTCYTGIADFIPADIE TVGYRVFLGHKQYFVSS 296

CmZEP DVGAGKMCQWYAFHKEPPGGTDAPNGKKERLFKIFEGWCDNVLDLQATDEDSVLRDIYDRTPIFTWKGKRVTLTGDSVHAMQPNMGQGGCMAIEDGYQL 400  
 CsZEP DVGAGKMCQWYAFHKEPPGGTDAPNGKKERLFKIFEGWCDNVLDLQATDEDSVLRDIYDRTPIFTWKGKRVTLTGDSVHAMQPNMGQGGCMAIEDGYQL 400  
 ClZEP DVGAGKMCQWYAFHKEPPGGTDAPNGKKERLFKIFEGWCDNVLDLQATDEDSVLRDIYDRTPIFTWKGKRVTLTGDSVHAMQPNMGQGGCMAIEDGYQL 400  
 CmoZEP DVGAGKMCQWYAFHKEPPGGTDAPNGKKERLFKIFEGWCDNVLDLQATDEDSVLRDIYDRTPIFTWKGKRVTLTGDSVHAMQPNMGQGGCMAIEDGYQL 400  
 PaZEP DVGAGKMCQWYAFHKEPPGGTDAPNGKKERLFKIFEGWCDNVLDLQATDEDSVLRDIYDRTPIFTWKGKRVTLTGDSVHAMQPNMGQGGCMAIEDGYQL 396

CmZEP ALELDKAWNESVSGSPIDIVSSLKSYESSRRIRVAVIHGMARMAALMASTYKAYLGVLGPLSFLTQFRIPHPGTFGGREFIDLAMPLMLNWLGNSS 500  
 CsZEP ALELDKAWNESVSGSPIDIVSSLKSYESSRRIRVAVIHGMARMAALMASTYKAYLGVLGPLSFLTQFRIPHPGTFGGREFIDLAMPLMLNWLGNSS 500  
 ClZEP ALELDKAWNESVSGSPIDIVSSLKSYESSRRIRVAVIHGMARMAALMASTYKAYLGVLGPLSFLTQFRIPHPGTFGGREFIDLAMPLMLNWLGNSS 500  
 CmoZEP ALELDKAWNESVSGSPIDIVSSLKSYESSRRIRVAVIHGMARMAALMASTYKAYLGVLGPLSFLTQFRIPHPGTFGGREFIDLAMPLMLNWLGNSS 500  
 PaZEP ALELDKAWNESVSGSPIDIVSSLKSYESSRRIRVAVIHGMARMAALMASTYKAYLGVLGPLSFLTQFRIPHPGTFGGREFIDLAMPLMLNWLGNSS 496

CmZEP KLEGRPPACRLSDKANDQLRKWFEDDDALERAINGDWFLLPQGGEASVSQPICLRDENQPCPLIGSVBCEVDSGLSIAIPLPQVSEKHARISYKDGAFFL 600  
 CsZEP KLEGRPPACRLSDKANDQLRKWFEDDDALERAINGDWFLLPQGGEASVSQPICLRDENQPCPLIGSVBCEVDSGLSIAIPLPQVSEKHARISYKDGAFFL 600  
 ClZEP KLEGRPPACRLSDKANDQLRKWFEDDDALERAINGDWFLLPQGGEASVSQPICLRDENQPCPLIGSVBCEVDSGLSIAIPLPQVSEKHARISYKDGAFFL 600  
 CmoZEP KLEGRPPACRLSDKANDQLRKWFEDDDALERAINGDWFLLPQGGEASVSQPICLRDENQPCPLIGSVBCEVDSGLSIAIPLPQVSEKHARISYKDGAFFL 600  
 PaZEP KLEGRPPACRLSDKANDQLRKWFEDDDALERAINGDWFLLPQGGEASVSQPICLRDENQPCPLIGSVBCEVDSGLSIAIPLPQVSEKHARISYKDGAFFL 596

CmZEP TDLRSEHGTLSDHEGRRYRVPNFPVRFHQSDLIEFGSDKKAFRVKVRSSVE--NDREKVMNS 665  
 CsZEP TDLRSEHGTLSDHEGRRYRVPNFPVRFHQSDLIEFGSDKKAFRVKVRSSVE--NDREKVMNS 665  
 ClZEP TDLRSEHGTLSDHEGRRYRVPNFPVRFHQSDLIEFGSDKKAFRVKVRSSVE--NDREKVMNS 665  
 CmoZEP TDLRSEHGTLSDHEGRRYRVPNFPVRFHQSDLIEFGSDKKAFRVKVRSSVE--NDREKVMNS 665  
 PaZEP TDLRSEHGTLSDHEGRRYRVPNFPVRFHQSDLIEFGSDKKAFRVKVRSSVE--NDREKVMNS 661

**Figure S5.** Multiple alignments of the amino acid sequences of CmZEP with other ZEPs. Identical residues are indicated by a black background, and similar residues are shaded with a gray background. The solid underlines indicate the short motifs typical of the lipocalin family of proteins, and the dotted underline indicates the FHA domain. CsZEP, *Cucumis sativus* (XM\_004163228); ClZEP, *Citrullus lanatus* (HM107775); CmoZEP, *Cucurbita moschata* (JN581943); PaZEP, *Prunus armeniaca* (AF159948).
